# Supplementary material for: Insect Resistance to Bacillus thuringiensis Toxin Cry2Ab Is Conferred by Mutations in an ABC Transporter Subfamily A Protein
Source: PubMed Central journal article supplement (PMC4652872; doi:10.1371/journal.pgen.1005534), 2015-11-19
Supplement: pgen.1005534.s004.pdf [file pgen.1005534.s004.pdf]

S2 Fig

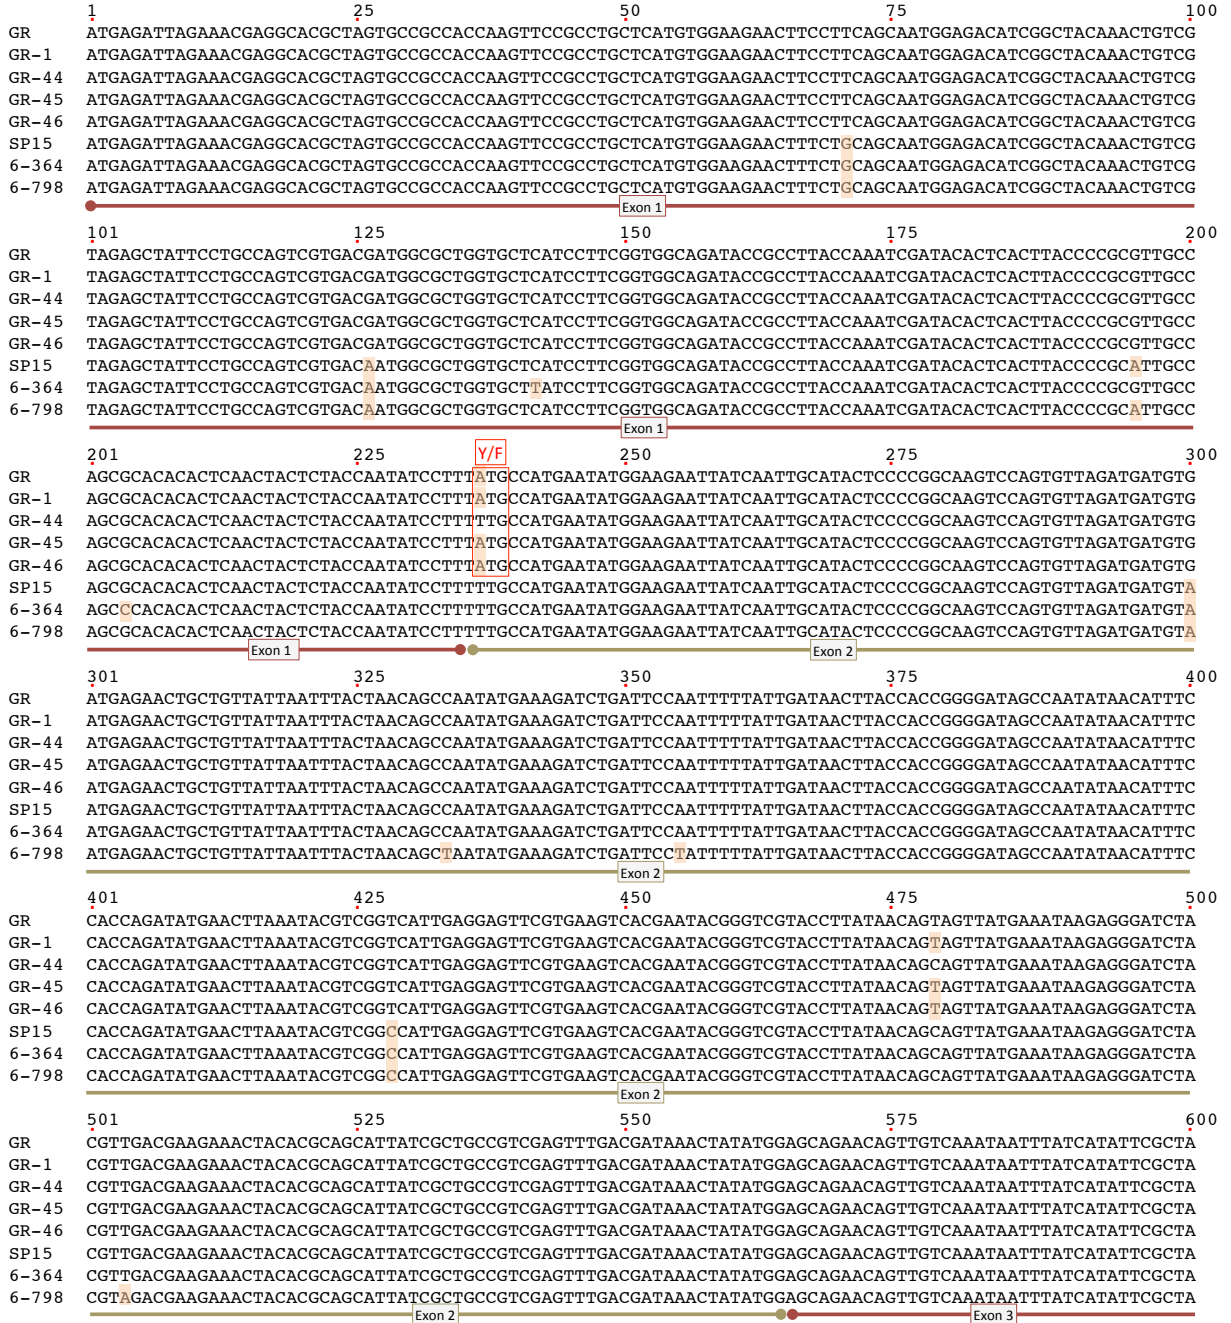

601 625 650 675 700  
GR CTTTTTCCTGAGAGACCCCGTCTCAATTCGTTTTTCCAAACTGGAGGGCGCACCTGGAGATCTGACGGAGTATCCCGGTTTTTCGAAGTGCCTGGGCCTA  
GR-1 CTTTTTCCTGAGAGACCCCGTCTCAATTCGTTTTTCCAAACTGGAGGGCGCACCTGGAGATCTGACGGAGTATCCCGGTTTTTCGAAGTGCCTGGGCCTA  
GR-44 CTTTTTCCTGAGAGACCCCGTCTCAATTCGTTTTTCCAAACTGGAGGGCGCACCTGGAGATCTGACGGAGTATCCCGGTTTTTCGAAGTGCCTGGGCCTA  
GR-45 CTTTTTCCTGAGAGACCCCGTCTCAATTCGTTTTTCCAAACTGGAGGGCGCACCTGGAGATCTGACGGAGTATCCCGGTTTTTCGAAGTGCCTGGGCCTA  
GR-46 CTTTTTCCTGAGAGACCCCGTCTCAATTCGTTTTTCCAAACTGGAGGGCGCACCTGGAGATCTGACGGAGTATCCCGGTTTTTCGAAGTGCCTGGGCCTA  
SP15 CTTTTTCCTGAGAGACCCCGTCTCAATTCGTTTTTCCAAACTGGAGGGCGCACCTGGAGATCTGACGGAGTATCCCGGTTTTTCGAAGTGCCTGGGCCTA  
6-364 CTTTTTCCTGAGAGACCCCGTCTCAATTCGTTTTTCCAAACTGGAGGGCGCACCTGGAGATCTGACGGAGTATCCCGGTTTTTCGAAGTGCCTGGGCCTA  
6-798 CTTTTTCCTGAGAGACCCCGTCTCAATTCGTTTTTCCAAACTGGAGGGCGCACCTGGAGATCTGACGGAGTATCCCGGTTTTTCGAAGTGCCTGGGCCTA

701 725 750 775 800  
GR GATTTCCCTCACTCGTGGGAAGGTGGTAATGACCCAGGTTACGTTAACGAAATGTTCTGGCACTTCAACAAGTTATATCAACGGAGCTGGTATCAAGGGC  
GR-1 GATTTCCCTCACTCGTGGGAAGGTGGTAATGACCCAGGTTACGTTAACGAAATGTTCTGGCACTTCAACAAGTTATATCAACGGAGCTGGTATCAAGGGC  
GR-44 GATTTCCCTCACTCGTGGGAAGGTGGTAATGACCCAGGTTACGTTAACGAAATGTTCTGGCACTTCAACAAGTTATATCAACGGAGCTGGTATCAAGGGC  
GR-45 GATTTCCCTCACTCGTGGGAAGGTGGTAATGACCCAGGTTACGTTAACGAAATGTTCTGGCACTTCAACAAGTTATATCAACGGAGCTGGTATCAAGGGC  
GR-46 GATTTCCCTCACTCGTGGGAAGGTGGTAATGACCCAGGTTACGTTAACGAAATGTTCTGGCACTTCAACAAGTTATATCAACGGAGCTGGTATCAAGGGC  
SP15 GATTTCCCTCACTCGTGGGAAGGTGGTAATGACCCAGGTTACGTTAACGAAATGTTCTGGCACTTCAACAAGTTATATCAACGGAGCTGGTATCAAGGGC  
6-364 GATTTCCCTCACTCGTGGGAAGGTGGTAATGACCCAGGTTACGTTAACGAAATGTTCTGGCACTTCAACAAGTTATATCAACGGAGCTGGTATCAAGGGC  
6-798 GATTTCCCTCACTCGTGGGAAGGTGGTAATGACCCAGGTTACGTTAACGAAATGTTCTGGCACTTCAACAAGTTATATCAACGGAGCTGGTATCAAGGGC

801 825 850 875 900  
GR AACCGGTTGGACTTGAAGTCATTTAGGGTGAACATTCAGAGGTACCCGCACCCCGCTACCTTACGACCAAGTTCAGTTGATCTGCTGCAGTTCATGTTT  
GR-1 AACCGGTTGGACTTGAAGTCATTTAGGGTGAACATTCAGAGGTACCCGCACCCCGCTACCTTACGACCAAGTTCAGTTGATCTGCTGCAGTTCATGTTT  
GR-44 AACCGGTTGGACTTGAAGTCATTTAGGGTGAACATTCAGAGGTACCCGCACCCCGCTACCTTACGACCAAGTTCAGTTGATCTGCTGCAGTTCATGTTT  
GR-45 AACCGGTTGGACTTGAAGTCATTTAGGGTGAACATTCAGAGGTACCCGCACCCCGCTACCTTACGACCAAGTTCAGTTGATCTGCTGCAGTTCATGTTT  
GR-46 AACCGGTTGGACTTGAAGTCATTTAGGGTGAACATTCAGAGGTACCCGCACCCCGCTACCTTACGACCAAGTTCAGTTGATCTGCTGCAGTTCATGTTT  
SP15 AACCGGTTGGACTTGAAGTCATTTAGGGTGAACATTCAGAGGTACCCGCACCCCGCTACCTTACGACCAAGTTCAGTTGATCTGCTGCAGTTCATGTTT  
6-364 AACCGGTTGGACTTGAAGTCATTTAGGGTGAACATTCAGAGGTACCCGCACCCCGCTACCTTACGACCAAGTTCAGTTGATCTGCTGCAGTTCATGTTT  
6-798 AACCGGTTGGACTTGAAGTCATTTAGGGTGAACATTCAGAGGTACCCGCACCCCGCTACCTTACGACCAAGTTCAGTTGATCTGCTGCAGTTCATGTTT

901 925 950 975 1000  
GR CCCCTGTTTCATCATGTTGAGCTTCAGCTACACTCCGTCACATTCGACGGGCGGTACAGTTGAGAAGGAATTGCAATTAAGGAAACTATGAAAATTA  
GR-1 CCCCTGTTTCATCATGTTGAGCTTCAGCTACACTCCGTCACATTCGACGGGCGGTACAGTTGAGAAGGAATTGCAATTAAGGAAACTATGAAAATTA  
GR-44 CCCCTGTTTCATCATGTTGAGCTTCAGCTACACTCCGTCACATTCGACGGGCGGTACAGTTGAGAAGGAATTGCAATTAAGGAAACTATGAAAATTA  
GR-45 CCCCTGTTTCATCATGTTGAGCTTCAGCTACACTCCGTCACATTCGACGGGCGGTACAGTTGAGAAGGAATTGCAATTAAGGAAACTATGAAAATTA  
GR-46 CCCCTGTTTCATCATGTTGAGCTTCAGCTACACTCCGTCACATTCGACGGGCGGTACAGTTGAGAAGGAATTGCAATTAAGGAAACTATGAAAATTA  
SP15 CCCCTGTTTCATCATGTTGAGCTTCAGCTACACTCCGTCACATTCGACGGGCGGTACAGTTGAGAAGGAATTGCAATTAAGGAAACTATGAAAATTA  
6-364 CCCCTGTTTCATCATGTTGAGCTTCAGCTACACTCCGTCACATTCGACGGGCGGTACAGTTGAGAAGGAATTGCAATTAAGGAAACTATGAAAATTA  
6-798 CCCCTGTTTCATCATGTTGAGCTTCAGCTACACTCCGTCACATTCGACGGGCGGTACAGTTGAGAAGGAATTGCAATTAAGGAAACTATGAAAATTA

1001 1025 1050 1075 1100  
GR TGGGTCCTCCACATGTTGCACTGGACAGCATGGTTTGTAAACAGTTTATCTACCTATCAATCACAGCTGTTCTGCTAGTTGTGTTGCTAAAGGTAAA  
GR-1 TGGGTCCTCCACATGTTGCACTGGACAGCATGGTTTGTAAACAGTTTATCTACCTATCAATCACAGCTGTTCTGCTAGTTGTGTTGCTAAAGGTAAA  
GR-44 TGGGTCCTCCACATGTTGCACTGGACAGCATGGTTTGTAAACAGTTTATCTACCTATCAATCACAGCTGTTCTGCTAGTTGTGTTGCTAAAGGTAAA  
GR-45 TGGGTCCTCCACATGTTGCACTGGACAGCATGGTTTGTAAACAGTTTATCTACCTATCAATCACAGCTGTTCTGCTAGTTGTGTTGCTAAAGGTAAA  
GR-46 TGGGTCCTCCACATGTTGCACTGGACAGCATGGTTTGTAAACAGTTTATCTACCTATCAATCACAGCTGTTCTGCTAGTTGTGTTGCTAAAGGTAAA  
SP15 TGGGTCCTCCACATGTTGCACTGGACAGCATGGTTTGTAAACAGTTTATCTACCTATCAATCACAGCTGTTCTGCTAGTTGTGTTGCTAAAGGTAAA  
6-364 TGGGTCCTCCACATGTTGCACTGGACAGCATGGTTTGTAAACAGTTTATCTACCTATCAATCACAGCTGTTCTGCTAGTTGTGTTGCTAAAGGTAAA  
6-798 TGGGTCCTCCACATGTTGCACTGGACAGCATGGTTTGTAAACAGTTTATCTACCTATCAATCACAGCTGTTCTGCTAGTTGTGTTGCTAAAGGTAAA

1101 1125 1150 1175 1200  
GR TTGGTTTACTAACGACGATGGCTTCAGCGAATATGCTGTATTTACTAATAACACCTTGGACGGTTTTGCTATTCTTCTTGATACTGTATTTATCTTGGCGG  
GR-1 TTGGTTTACTAACGACGATGGCTTCAGCGAATATGCTGTATTTACTAATAACACCTTGGACGGTTTTGCTATTCTTCTTGATACTGTATTTATCTTGGCGG  
GR-44 TTGGTTTACTAACGACGATGGCTTCAGCGAATATGCTGTATTTACTAATAACACCTTGGACGGTTTTGCTATTCTTCTTGATACTGTATTTATCTTGGCGG  
GR-45 TTGGTTTACTAACGACGATGGCTTCAGCGAATATGCTGTATTTACTAATAACACCTTGGACGGTTTTGCTATTCTTCTTGATACTGTATTTATCTTGGCGG  
GR-46 TTGGTTTACTAACGACGATGGCTTCAGCGAATATGCTGTATTTACTAATAACACCTTGGACGGTTTTGCTATTCTTCTTGATACTGTATTTATCTTGGCGG  
SP15 TTGGTTTACTAACGACGATGGCTTCAGCGAATATGCTGTATTTACTAATAACACCTTGGACGGTTTTGCTATTCTTCTTGATACTGTATTTATCTTGGCGG  
6-364 TTGGTTTACTAACGACGATGGCTTCAGCGAATATGCTGTATTTACTAATAACACCTTGGACGGTTTTGCTATTCTTCTTGATACTGTATTTATCTTGGCGG  
6-798 TTGGTTTACTAACGACGATGGCTTCAGCGAATATGCTGTATTTACTAATAACACCTTGGACGGTTTTGCTATTCTTCTTGATACTGTATTTATCTTGGCGG

L/F

GR 1201 1225 1250 1275 1300  
ATATTTTTTCTTTCATGGTAAGCAGTATATTTTCAAAGGTAGTACGGCCGCGTGTGTTTATGGCGGTGGCATGGTTCCTCACTTACATCCCTGCTTTCC  
GR-1 ATATTTTTTCTTTCATGGTAAGCAGTATATTTTCAAAGGTAGTACGGCCGCGTGTGTTTATGGCGGTGGCATGGTTCCTCACTTACATCCCTGCTTTCC  
GR-44 ATATTTTTTCTTTCATGGTAAGCAGTATATTTTCAAAGGTAGTACGGCCGCGTGTGTTTATGGCGGTGGCATGGTTCCTCACTTACATCCCTGCTTTCC  
GR-45 ATATTTTTTCTTTCATGGTAAGCAGTATATTTTCAAAGGTAGTACGGCCGCGTGTGTTTATGGCGGTGGCATGGTTCCTCACTTACATCCCTGCTTTCC  
GR-46 ATATTTTTTCTTTCATGGTAAGCAGTATATTTTCAAAGGTAGTACGGCCGCGTGTGTTTATGGCGGTGGCATGGTTCCTCACTTACATCCCTGCTTTCC  
SP15 ATATTTTTTCTTTCATGGTAAGCAGTATATTTTCAAAGGTAGTACGGCCGCGTGTGTTTATGGCGGTGGCATGGTTCCTCACTTACATCCCTGCTTTCC  
6-364 ATATTTTTTCTTTCATGGTAAGCAGTATATTTTCAAAGGTAGTACGGCCGCGTGTGTTTATGGCGGTGGCATGGTTCCTCACTTACATCCCTGCTTTCC  
6-798 ATATTTTTTCTTTCATGGTAAGCAGTATATTTTCAAAGGTAGTACGGCCGCGTGTGTTTATGGCGGTGGCATGGTTCCTCACTTACATCCCTGCTTTCC

GR 1301 1325 1350 1375 1400  
TCCTGGCCATGGATATCAATATGTCGACTGCGGTGCAGGTCATCAGTGCTTCAGTATTAACCTGCGATGTCCTATGGTTTCCAACCTAATGCTCGCTAA  
GR-1 TCCTGGCCATGGATATCAATATGTCGACTGCGGTGCAGGTCATCAGTGCTTCAGTATTAACCTGCGATGTCCTATGGTTTCCAACCTAATGCTCGCTAA  
GR-44 TCCTGGCCATGGATATCAATATGTCGACTGCGGTGCAGGTCATCAGTGCTTCAGTATTAACCTGCGATGTCCTATGGTTTCCAACCTAATGCTCGCTAA  
GR-45 TCCTGGCCATGGATATCAATATGTCGACTGCGGTGCAGGTCATCAGTGCTTCAGTATTAACCTGCGATGTCCTATGGTTTCCAACCTAATGCTCGCTAA  
GR-46 TCCTGGCCATGGATATCAATATGTCGACTGCGGTGCAGGTCATCAGTGCTTCAGTATTAACCTGCGATGTCCTATGGTTTCCAACCTAATGCTCGCTAA  
SP15 TCCTGGCCATGGATATCAATATGTCGACTGCGGTGCAGGTCATCAGTGCTTCAGTATTAACCTGCGATGTCCTATGGTTTCCAACCTAATGCTCGCTAA  
6-364 TCCTGGCCATGGATATCAATATGTCGACTGCGGTGCAGGTCATCAGTGCTTCAGTATTAACCTGCGATGTCCTATGGTTTCCAACCTAATGCTCGCTAA  
6-798 TCCTGGCCATGGATATCAATATGTCGACTGCGGTGCAGGTCATCAGTGCTTCAGTATTAACCTGCGATGTCCTATGGTTTCCAACCTAATGCTCGCTAA

GR 1401 1425 1450 1475 1500  
GGAAAGCACTGGAGGCTGCAGTGGGGCGACTTCATGACGTCACCAGGACGGACACCACGCGCTTGGTGTTCGGCCACGTGGTCATCATGCTGGTAGTG  
GR-1 GGAAAGCACTGGAGGCTGCAGTGGGGCGACTTCATGACGTCACCAGGACGGACACCACGCGCTTGGTGTTCGGCCACGTGGTCATCATGCTGGTAGTG  
GR-44 GGAAAGCACTGGAGGCTGCAGTGGGGCGACTTCATGACGTCACCAGGACGGACACCACGCGCTTGGTGTTCGGCCACGTGGTCATCATGCTGGTAGTG  
GR-45 GGAAAGCACTGGAGGCTGCAGTGGGGCGACTTCATGACGTCACCAGGACGGACACCACGCGCTTGGTGTTCGGCCACGTGGTCATCATGCTGGTAGTG  
GR-46 GGAAAGCACTGGAGGCTGCAGTGGGGCGACTTCATGACGTCACCAGGACGGACACCACGCGCTTGGTGTTCGGCCACGTGGTCATCATGCTGGTAGTG  
SP15 GGAAAGCACTGGAGGCTGCAGTGGGGCGACTTCATGACGTCACCAGGACGGACACCACGCGCTTGGTGTTCGGCCACGTGGTCATCATGCTGGTAGTG  
6-364 GGAAAGCACTGGAGGCTGCAGTGGGGCGACTTCATGACGTCACCAGGACGGACACCACGCGCTTGGTGTTCGGCCACGTGGTCATCATGCTGGTAGTG  
6-798 GGAAAGCACTGGAGGCTGCAGTGGGGCGACTTCATGACGTCACCAGGACGGACACCACGCGCTTGGTGTTCGGCCACGTGGTCATCATGCTGGTAGTG

GR 1501 1525 1550 1575 1600  
GACTGCCTCATCTACATGCTGATCACCCTCTACCTTGAACAAGTGTACCAGGACCCCTTCGGGACTCCCAAACCTTGGTACTTCCCTTCCAGTTGCAGT  
GR-1 GACTGCCTCATCTACATGCTGATCACCCTCTACCTTGAACAAGTGTACCAGGACCCCTTCGGGACTCCCAAACCTTGGTACTTCCCTTCCAGTTGCAGT  
GR-44 GACTGCCTCATCTACATGCTGATCACCCTCTACCTTGAACAAGTGTACCAGGACCCCTTCGGGACTCCCAAACCTTGGTACTTCCCTTCCAGTTGCAGT  
GR-45 GACTGCCTCATCTACATGCTGATCACCCTCTACCTTGAACAAGTGTACCAGGACCCCTTCGGGACTCCCAAACCTTGGTACTTCCCTTCCAGTTGCAGT  
GR-46 GACTGCCTCATCTACATGCTGATCACCCTCTACCTTGAACAAGTGTACCAGGACCCCTTCGGGACTCCCAAACCTTGGTACTTCCCTTCCAGTTGCAGT  
SP15 GACTGCCTCATCTACATGCTGATCACCCTCTACCTTGAACAAGTGTACCAGGACCCCTTCGGGACTCCCAAACCTTGGTACTTCCCTTCCAGTTGCAGT  
6-364 GACTGCCTCATCTACATGCTGATCACCCTCTACCTTGAACAAGTGTACCAGGACCCCTTCGGGACTCCCAAACCTTGGTACTTCCCTTCCAGTTGCAGT  
6-798 GACTGCCTCATCTACATGCTGATCACCCTCTACCTTGAACAAGTGTACCAGGACCCCTTCGGGACTCCCAAACCTTGGTACTTCCCTTCCAGTTGCAGT

GR 1601 1625 1650 1675 1700  
TCTGGTTCCCAAATATAAATCGAAAGATGCTGGATTAATTTTCGAAAATGATAACAGTGAATTTGATGATATTATAAAGAAAAGGATCCACAGACCA  
GR-1 TCTGGTTCCCAAATATAAATCGAAAGATGCTGGATTAATTTTCGAAAATGATAACAGTGAATTTGATGATATTATAAAGAAAAGGATCCACAGACCA  
GR-44 TCTGGTTCCCAAATATAAATCGAAAGATGCTGGATTAATTTTCGAAAATGATAACAGTGAATTTGATGATATTATAAAGAAAAGGATCCACAGACCA  
GR-45 TCTGGTTCCCAAATATAAATCGAAAGATGCTGGATTAATTTTCGAAAATGATAACAGTGAATTTGATGATATTATAAAGAAAAGGATCCACAGACCA  
GR-46 TCTGGTTCCCAAATATAAATCGAAAGATGCTGGATTAATTTTCGAAAATGATAACAGTGAATTTGATGATATTATAAAGAAAAGGATCCACAGACCA  
SP15 TCTGGTTCCCAAATATAAATCGAAAGATGCTGGATTAATTTTCGAAAATGATAACAGTGAATTTGATGATATTATAAAGAAAAGGATCCACAGACCA  
6-364 TCTGGTTCCCAAATATAAATCGAAAGATGCTGGATTAATTTTCGAAAATGATAACAGTGAATTTGATGATATTATAAAGAAAAGGATCCACAGACCA  
6-798 TCTGGTTCCCAAATATAAATCGAAAGATGCTGGATTAATTTTCGAAAATGATAACAGTGAATTTGATGATATTATAAAGAAAAGGATCCACAGACCA

GR 1701 1725 1750 1775 1800  
CGAAGTTGGTGTAGAAATGCAAAATTTAACAAAAATCTTTGGGAATAACATAGCTGTAAACAATTTATCTTTGAATATCTATGACGATCAAATCACAGTT  
GR-1 TGAAGTTGGTGTAGAAATGCAAAATTTAACAAAAATCTTTGGGAATAACATAGCTGTAAACAATTTATCTTTGAATATCTATGACGATCAAATCACAGTT  
GR-44 TGAAGTTGGTGTAGAAATGCAAAATTTAACAAAAATCTTTGGGAATAACATAGCTGTAAACAATTTATCTTTGAATATCTATGACGATCAAATCACAGTT  
GR-45 TGAAGTTGGTGTAGAAATGCAAAATTTAACAAAAATCTTTGGGAATAACATAGCTGTAAACAATTTATCTTTGAATATCTATGACGATCAAATCACAGTT  
GR-46 TGAAGTTGGTGTAGAAATGCAAAATTTAACAAAAATCTTTGGGAATAACATAGCTGTAAACAATTTATCTTTGAATATCTATGACGATCAAATCACAGTT  
SP15 CGAAGTTGGTGTAGAAATGCAAAATTTAACAAAAATCTTTGGGAATAACATAGCTGTAAACAATTTATCTTTGAATATCTATGACGATCAAATCACAGTT  
6-364 CGAAGTTGGTGTAGAAATGCAAAATTTAACAAAAATCTTTGGGAATAACATAGCTGTAAACAATTTATCTTTGAATATCTATGACGATCAAATCACAGTT  
6-798 CGAAGTTGGTGTAGAAATGCAAAATTTAACAAAAATCTTTGGGAATAACATAGCTGTAAACAATTTATCTTTGAATATCTATGACGATCAAATCACAGTT



2401 2425 2450 2475 2500  
GR AAGGACACAGACTTCGACTTTGTGAAATGCTCCGTA...  
GR-1 AAGGACACAGACTTCGACTTTGTGAAATGCTCCGTA...  
GR-44 AAGGACACAGACTTCGACTTTGTGAAATGCTCCGTA...  
GR-45 AAGGACACAGACTTCGACTTTGTGAAATGCTCCGTA...  
GR-46 AAGGACACAGACTTCGACTTTGTGAAATGCTCCGTA...  
SP15 AAGGACACAGACTTCGACTTTGTGAAATGCTCCGTA...  
6-364 AAGGACACAGACTTCGACTTTGTGAAATGCTCCGTA...  
6-798 AAGGACACAGACTTCGACTTTGTGAAATGCTCCGTA...

2501 2525 2550 2575 2600  
GR ATTTGGTAAATGATTACTCACACGTTTTTGAAGAA...  
GR-1 ATTTGGTAAATGATTACTCACACGTTTTTGAAGAA...  
GR-44 ATTTGGTAAATGATTACTCACACGTTTTTGAAGAA...  
GR-45 ATTTGGTAAATGATTACTCACACGTTTTTGAAGAA...  
GR-46 ATTTGGTAAATGATTACTCACACGTTTTTGAAGAA...  
SP15 ATTTGGTAAATGATTACTCACACGTTTTTGAAGAA...  
6-364 ATTTGGTAAATGATTACTCACACGTTTTTGAAGAA...  
6-798 ATTTGGTAAATGATTACTCACACGTTTTTGAAGAA...

2601 2625 2650 2675 2700  
GR TACATTAGAAGATGCTTTATGTCGGTGGTGCCGACT...  
GR-1 TACATTAGAAGATGCTTTATGTCGGTGGTGCCGACT...  
GR-44 TACATTAGAAGATGCTTTATGTCGGTGGTGCCGACT...  
GR-45 TACATTAGAAGATGCTTTATGTCGGTGGTGCCGACT...  
GR-46 TACATTAGAAGATGCTTTATGTCGGTGGTGCCGACT...  
SP15 TACATTAGAAGATGCTTTATGTCGGTGGTGCCGACT...  
6-364 TACATTAGAAGATGCTTTATGTCGGTGGTGCCGACT...  
6-798 TACATTAGAAGATGCTTTATGTCGGTGGTGCCGACT...

2701 2725 2750 2775 2800  
GR GATATATTTAAAACAAGAAATCGATTCATCTTTGGA...  
GR-1 GATATATTTAAAACAAGAAATCGATTCATCTTTGGA...  
GR-44 GATATATTTAAAACAAGAAATCGATTCATCTTTGGA...  
GR-45 GATATATTTAAAACAAGAAATCGATTCATCTTTGGA...  
GR-46 GATATATTTAAAACAAGAAATCGATTCATCTTTGGA...  
SP15 GATATATTTAAAACAAGAAATCGATTCATCTTTGGA...  
6-364 GATATATTTAAAACAAGAAATCGATTCATCTTTGGA...  
6-798 GATATATTTAAAACAAGAAATCGATTCATCTTTGGA...

2801 2825 2850 2875 2900  
GR TATGGATGAAGCAGTGGCTGGTGTGATCCGCTCGCC...  
GR-1 TATGGATGAAGCAGTGGCTGGTGTGATCCGCTCGCC...  
GR-44 TATGGATGAAGCAGTGGCTGGTGTGATCCGCTCGCC...  
GR-45 TATGGATGAAGCAGTGGCTGGTGTGATCCGCTCGCC...  
GR-46 TATGGATGAAGCAGTGGCTGGTGTGATCCGCTCGCC...  
SP15 TATGGATGAAGCAGTGGCTGGTGTGATCCGCTCGCC...  
6-364 TATGGATGAAGCAGTGGCTGGTGTGATCCGCTCGCC...  
6-798 TATGGATGAAGCAGTGGCTGGTGTGATCCGCTCGCC...

2901 2925 2950 2975 3000  
GR GCGTTACGTCATGCTTTTATCACCACCATTAGA...  
GR-1 GCGTTACGTCATGCTTTTATCACCACCATTAGA...  
GR-44 GCGTTACGTCATGCTTTTATCACCACCATTAGA...  
GR-45 GCGTTACGTCATGCTTTTATCACCACCATTAGA...  
GR-46 GCGTTACGTCATGCTTTTATCACCACCATTAGA...  
SP15 GCGTTACGTCATGCTTTTATCACCACCATTAGA...  
6-364 GCGTTACGTCATGCTTTTATCACCACCATTAGA...  
6-798 GCGTTACGTCATGCTTTTATCACCACCATTAGA...

3001 3025 3050 3075 3100  
 GR GTAGCGTCATCAGTGGGCGCCCTAGCGGCGCAAGCATACCAAAGCCTGTTTCGCCAATCTGGTGTATGGACATGGAAATCAACGCTATGGGAAGCCAGC  
 GR-1 GTAGCGTCATCAGTGGGCGCCCTAGCGGCGCAAGCATACCAAAGCCTGTTTCGCCAATCTGGTGTATGGACATGGAAATCAACGCTATGGGAAGCCAGC  
 GR-44 GTAGCGTCATCAGTGGGCGCCCTAGCGGCGCAAGCATACCAAAGCCTGTTTCGCCAATCTGGTGTATGGACATGGAAATCAACGCTATGGGAAGCCAGC  
 GR-45 GTAGCGTCATCAGTGGGCGCCCTAGCGGCGCAAGCATACCAAAGCCTGTTTCGCCAATCTGGTGTATGGACATGGAAATCAACGCTATGGGAAGCCAGC  
 GR-46 GTAGCGTCATCAGTGGGCGCCCTAGCGGCGCAAGCATACCAAAGCCTGTTTCGCCAATCTGGTGTATGGACATGGAAATCAACGCTATGGGAAGCCAGC  
 SP15 GTATCGTCATCAGTGGGCGCCCTAGCGGCGCAAGCATACCAAAGCCTGTTTCGCCAATCTGGTGTATGGACATGGAAATCAACGCTATGGGAAGCCAGC  
 6-364 GTAGCGTCATCAGTGGGCGCCCTAGCGGCGCAAGCATACCAAAGCCTGTTTCGCCAATCTGGTGTATGGACATGGAAATCAACGCTATGGGAAGCCAGC  
 6-798 GTAGCGTCATCAGTGGGCGCCCTAGCGGCGCAAGCATACCAAAGCCTGTTTCGCCAATCTGGTGTATGGACATGGAAATCAACGCTATGGGAAGCCAGC  
 Exon 17  
 3101 3125 3150 3175 3200  
 GR CAATAGAAGAATATTATCTAAATAGAACAAGTGATCCCGTTGTGATGGGTTTCGCTGCGGCACCCTGCTGATAGGCTCCACATTTGACGACGACTTCGC  
 GR-1 CAATAGAAGAATATTATCTAAATAGAACAAGTGATCCCGTTGTGATGGGTTTCGCTGCGGCACCCTGCTGATAGGCTCCACATTTGACGACGACTTCGC  
 GR-44 CAATAGAAGAATATTATCTAAATAGAACAAGTGATCCCGTTGTGATGGGTTTCGCTGCGGCACCCTGCTGATAGGCTCCACATTTGACGACGACTTCGC  
 GR-45 CAATAGAAGAATATTATCTAAATAGAACAAGTGATCCCGTTGTGATGGGTTTCGCTGCGGCACCCTGCTGATAGGCTCCACATTTGACGACGACTTCGC  
 GR-46 CAATAGAAGAATATTATCTAAATAGAACAAGTGATCCCGTTGTGATGGGTTTCGCTGCGGCACCCTGCTGATAGGCTCCACATTTGACGACGACTTCGC  
 SP15 CAATAGAAGAATATTATCTAAATAGAACAAGTGATCCCGTTGTGATGGGTTTCGCTGCGGCACCCTGCTGATAGGCTCCACATTTGACGACGACTTCGC  
 6-364 CAATAGAAAATATTATCTAAATAGA-----TGATCCCGTTGTGATGGGTTTCGCTGCGGCACCCTGCTGATAGGCTCCACATTTGACGACGACTTCGC  
 6-798 CAATAGAAAATATTATCTAAATAGAACAAGTGATCCCGTTGTGATGGGTTTCGCTGCGGCACCCTGCTGATAGGCTCCACATTTGACGACGACTTCGC  
 P/A Exon 17 Exon 18  
 3201 3225 3250 3275 3300  
 GR TACCGCCTGGTTCAGTAATTTCCGGCTACCACGATGTTGCTACATCGCTTGCGGCAATCCACTCAGCTATTTCCAGATCTAAAAACTCGGATGCAGTACTC  
 GR-1 TACCGCCTGGTTCAGTAATTTCCGGCTACCACGATGTTGCTACATCGCTTGCGGCAATCCACTCAGCTATTTCCAGATCTAAAAACTCGGATGCAGTACTC  
 GR-44 TACCGCCTGGTTCAGTAATTTCCGGCTACCACGATGTTGCTACATCGCTTGCGGCAATCCACTCAGCTATTTCCAGATCTAAAAACTCGGATGCAGTACTC  
 GR-45 TACCGCCTGGTTCAGTAATTTCCGGCTACCACGATGTTGCTACATCGCTTGCGGCAATCCACTCAGCTATTTCCAGATCTAAAAACTCGGATGCAGTACTC  
 GR-46 TACCGCCTGGTTCAGTAATTTCCGGCTACCACGATGTTGCTACATCGCTTGCGGCAATCCACTCAGCTATTTCCAGATCTAAAAACTCGGATGCAGTACTC  
 SP15 TACCGCCTGGTTCAGTAATTTCCGGCTACCACGATGTTGCTACATCGCTTGCGGCAATCCACTCAGCTATTTCCAGATCTAAAAACTCGGATGCAGTACTC  
 6-364 TACCGCCTGGTTCAGTAATTTCCGGCTACCACGATGTTGCTACATCGCTTGCGGCAATCCACTCAGCTATTTCCAGATCTAAAAACTCGGATGCAGTACTC  
 6-798 TACCGCCTGGTTCAGTAATTTCCGGCTACCACGATGTTGCTACATCGCTTGCGGCAATCCACTCAGCTATTTCCAGATCTAAAAACTCGGATGCAGTACTC  
 Exon 18  
 3301 3325 3350 3375 3400  
 GR AATGTATATAAATCATCCCTTGAAGCTTCTTACATAGATCAGAGTGACGTGCAGACTATGATAGCTATGTTGTCCATGCAGTTGTCCCTTGGCATCGGCA  
 GR-1 AATGTATATAAATCATCCCTTGAAGCTTCTTACATAGATCAGAGTGACGTGCAGACTATGATAGCTATGTTGTCCATGCAGTTGTCCCTTGGCATCGGCA  
 GR-44 AATGTATATAAATCATCCCTTGAAGCTTCTTACATAGATCAGAGTGACGTGCAGACTATGATAGCTATGTTGTCCATGCAGTTGTCCCTTGGCATCGGCA  
 GR-45 AATGTATATAAATCATCCCTTGAAGCTTCTTACATAGATCAGAGTGACGTGCAGACTATGATAGCTATGTTGTCCATGCAGTTGTCCCTTGGCATCGGCA  
 GR-46 AATGTATATAAATCATCCCTTGAAGCTTCTTACATAGATCAGAGTGACGTGCAGACTATGATAGCTATGTTGTCCATGCAGTTGTCCCTTGGCATCGGCA  
 SP15 AATGTATATAAATCATCCCTTGAAGCTTCTGTAATAGATCAGAGTGACGTGCAGACTATGATAGCTATGTTGTCCATGCAGTTGTCCCTTGGCATCGGCA  
 6-364 AATGTATATAAATCATCCCTTGAAGCTTCTTACATAGATCAGAGTGACGTGCAGACTATGATAGCTATGTTGTCCATGCAGTTGTCCCTTGGCATCGGCA  
 6-798 AATGTATATAAATCATCCCTTGAAGCTTCTTACATAGATCAGAGTGACGTGCAGACTATGATAGCTATGTTGTCCATGCAGTTGTCCCTTGGCATCGGCA  
 Exon 18 Exon 19  
 3401 3425 3450 3475 3500  
 GR GTAGTGTGAGCATTGTTAGTGCAGTTTTCATCATGTTTTATATCAAGGAACGATATGTCGGGGGCTAAACTTCTACAAAATGCAGCAGGCGTGGCCCTGC  
 GR-1 GTAGTGTGAGCATTGTTAGTGCAGTTTTCATCATGTTTTATATCAAGGAACGATATGTCGGGGGCTAAACTTCTACAAAATGCAGCAGGCGTGGCCCTGC  
 GR-44 GTAGTGTGAGCATTGTTAGTGCAGTTTTCATCATGTTTTATATCAAGGAACGATATGTCGGGGGCTAAACTTCTACAAAATGCAGCAGGCGTGGCCCTGC  
 GR-45 GTAGTGTGAGCATTGTTAGTGCAGTTTTCATCATGTTTTATATCAAGGAACGATATGTCGGGGGCTAAACTTCTACAAAATGCAGCAGGCGTGGCCCTGC  
 GR-46 GTAGTGTGAGCATTGTTAGTGCAGTTTTCATCATGTTTTATATCAAGGAACGATATGTCGGGGGCTAAACTTCTACAAAATGCAGCAGGCGTGGCCCTGC  
 SP15 GTAGTGTGAGCATTGTTAGTGCAGTTTTCATCATGTTTTATATCAAGGAACGATATGTCGGGGGCTAAACTTCTACAAAATGCAGCAGGCGTGGCCCTGC  
 6-364 GTAGTGTGAGCATTGTTAGTGCAGTTTTCATCATGTTTTATATCAAGGAACGATATGTCGGGGGCTAAACTTCTACAAAATGCAGCAGGCGTGGCCCTGC  
 6-798 GTAGTGTGAGCATTGTTAGTGCAGTTTTCATCATGTTTTATATCAAGGAACGATATGTCGGGGGCTAAACTTCTACAAAATGCAGCAGGCGTGGCCCTGC  
 Exon 19 Exon 20  
 3501 3525 3550 3575 3600  
 GR TGTGCTGTGGGCGGCGCAGCGATCTCAATTGGTTTTGGTTCCTCATCACTTGTGTTTCCATCGTCATCTCGTGCCTCGCTTTTGATGTCATCGGGTTG  
 GR-1 TGTGCTGTGGGCGGCGCAGCGATCTCAATTGGTTTTGGTTCCTCATCACTTGTGTTTCCATCGTCATCTCGTGCCTCGCTTTTGATGTCATCGGGTTG  
 GR-44 TGTGCTGTGGGCGGCGCAGCGATCTCAATTGGTTTTGGTTCCTCATCACTTGTGTTTCCATCGTCATCTCGTGCCTCGCTTTTGATGTCATCGGGTTG  
 GR-45 TGTGCTGTGGGCGGCGCAGCGATCTCAATTGGTTTTGGTTCCTCATCACTTGTGTTTCCATCGTCATCTCGTGCCTCGCTTTTGATGTCATCGGGTTG  
 GR-46 TGTGCTGTGGGCGGCGCAGCGATCTCAATTGGTTTTGGTTCCTCATCACTTGTGTTTCCATCGTCATCTCGTGCCTCGCTTTTGATGTCATCGGGTTG  
 SP15 TGTGCTGTGGGCGGCGCAGCGATCTCAATTGGTTTTGGTTCCTCATCACTTGTGTTTCCATCGTCATCTCGTGCCTCGCTTTTGATGTCATCGGGTTG  
 6-364 TGTGCTGTGGGCGGCGCAGCGATCTCAATTGGTTTTGGTTCCTCATCACTTGTGTTTCCATCGTCATCTCGTGCCTCGCTTTTGATGTCATCGGGTTG  
 6-798 TGTGCTGTGGGCGGCGCAGCGATCTCAATTGGTTTTGGTTCCTCATCACTTGTGTTTCCATCGTCATCTCGTGCCTCGCTTTTGATGTCATCGGGTTG  
 Exon 20

3601 3625 3650 3675 3700  
 GR TCGACCGTGCATGAATTAGGCCGAATGTTTCTGTGCGTCATGGTATACGGTGCAGCAATGTTGCCATTAGTGTACCTTCTGTCACTTAAGTTCAAGGGAC  
 GR-1 TCGACCGTGCATGAATTAGGCCGAATGTTTCTGTGCGTCATGGTATACGGTGCAGCGATGTTGCCATTAGTGTACCTTCTGTGCGTTAAGTTCAAGGGAC  
 GR-44 TCGACCGTGCATGAATTAGGCCGAATGTTTCTGTGCGTCATGGTATACGGTGCAGCGATGTTGCCATTAGTGTACCTTCTGTGCGTTAAGTTCAAGGGAC  
 GR-45 TCGACCGTGCATGAATTAGGCCGAATGTTTCTGTGCGTCATGGTATACGGTGCAGCGATGTTGCCATTAGTGTACCTTCTGTGCGTTAAGTTCAAGGGAC  
 GR-46 TCGACCGTGCATGAATTAGGCCGAATGTTTCTGTGCGTCATGGTATACGGTGCAGCGATGTTGCCATTAGTGTACCTTCTGTGCGTTAAGTTCAAGGGAC  
 SP15 TCGACCGTGCATGAATTAGGCCGAATGTTTCTGTGCGTCATGGTATACGGTGCAGCAATGTTGCCATTAGTGTACCTTCTGTGCGTTAAGTTCAAGGGAC  
 6-364 TCGACCGTGCATGAATTAGGCCGAATGTTTCTGTGCGTCATGGTATACGGTGCAGCAATGTTGCCATTAGTGTACCTTCTGTCACTTAAGTTCAAGGGAC  
 6-798 TCAACCGTGCATGAATTAGGCCAAATGTTTCTGTGCGTCATGGTATACGGTGCAGCAATGTTGCCATTAGTGTACCTTCTGTCACTTAAGTTCAAGGGAC

3701 3725 3750 3775 3800  
 GR CAGCTGTCGGCTTCGTGGGTTTCTACTTCTCAACGTGCTTTTCGGTATGATGGGTGCGCAGGTGGTGGAGGCACATCTTCTCTATGCTGGACACGGA  
 GR-1 CAGCTGTCGGCTTCGTGGGTTTCTACTTCTCAACGTGCTTTTCGGTATGATGGGTGCGCAGGTGGTGGAGGCACATCTCTCTCTGTCTGGACACGGA  
 GR-44 CAGCTGTCGGCTTCGTGGGTTTCTACTTCTCAACGTGCTTTTCGGTATGATGGGTGCGCAGGTGGTGGAGGCACATCTCTCTCTGTCTGGACACGGA  
 GR-45 CAGCTGTCGGCTTCGTGGGTTTCTACTTCTCAACGTGCTTTTCGGTATGATGGGTGCGCAGGTGGTGGAGGCACATCTCTCTCTGTCTGGACACGGA  
 GR-46 CAGCTGTCGGCTTCGTGGGTTTCTACTTCTCAACGTGCTTTTCGGTATGATGGGTGCGCAGGTGGTGGAGGCACATCTCTCTCTGTCTGGACACGGA  
 SP15 CAGCTGTCGGCTTCGTGGGTTTCTACTTCTCAACGTGCTTTTCGGTATGATGGGTGCGCAGGTGGTGGAGGCACATCTTCTCTATGCTGGACACGGA  
 6-364 CAGCTGTCGGCTTCGTGGGTTTCTACTTCTCAACGTGCTTTTCGGTATGATGGGTGCGCAGGTGGTGGAGGCACATCTCTCTCTATGCTGGACACGGA  
 6-798 CAGCTGTCGGCTTCGTGGGTTTCTACTTCTCAACGTGCTTTTCGGTATGATGGGTGCGCAGGTGGTGGAGGCACATCTTCTCTATGCTGGACACAGA

3801 3825 3850 3875 3900  
 GR GCAAGCCGCCACATCTTCTGACTACTTACTGCAGTCTTACCCTGTTACAGCCTTGTGCACATCTATCAGGTTTTTGAATCAAGTCGGCTACGGGAGTAC  
 GR-1 GCAAGCCGCCACATCTTCTGACTACTTACTGCAGTCTTACCCTGTTACAGCCTTGTGCACATCTATCAGGTTTTTGAATCAAGTCGGCTACGGGAGTAC  
 GR-44 GCAAGCCGCCACATCTTCTGACTACTTACTGCAGTCTTACCCTGTTACAGCCTTGTGCACATCTATCAGGTTTTTGAATCAAGTCGGCTACGGGAGTAC  
 GR-45 GCAAGCCGCCACATCTTCTGACTACTTACTGCAGTCTTACCCTGTTACAGCCTTGTGCACATCTATCAGGTTTTTGAATCAAGTCGGCTACGGGAGTAC  
 GR-46 GCAAGCCGCCACATCTTCTGACTACTTACTGCAGTCTTACCCTGTTACAGCCTTGTGCACATCTATCAGGTTTTTGAATCAAGTCGGCTACGGGAGTAC  
 SP15 GCAAGCCGCCACATCTTCTGACTACTTACTGCAGTCTTACCCTGTTACAGCCTTGTGCACATCTATCAGGTTTTTGAATCAAGTCGGCTACGGGAGTAC  
 6-364 GCAAGCCGCCACATCTTCTGACTACTTACTGCAGTCTTACCCTGTTACAGCCTTGTGCACATCTATCAGGTTTTTGAATCAAGTCGGCTACGGGAGTAC  
 6-798 GCAAGCCGCCACATCTTCTGACTACTTACTGCAGTCTTACCCTGTTACAGCCTTGTGCACATCTATCAGGTTTTTGAATCAAGTCGGCTACGGGAGTAC

3901 3925 3950 3975 4000  
 GR ACTTGCTTACAAGCCTGTGAGTACTTGAAGCAGTATACCCGAATCTAGAGTGCAACATGGCAAGCATGTGCGAATTCACAGTGACTGCTGCGTTCGTG  
 GR-1 ACTTGCTTACAAGCCTGTGAGTACTTGAAGCAGTATACCCGAATCTAGAGTGCAACATGGCAAGCATGTGCGAATTCACAGTGACTGCTGCGTTCGTG  
 GR-44 ACTTGCTTACAAGCCTGTGAGTACTTGAAGCAGTATACCCGAATCTAGAGTGCAACATGGCAAGCATGTGCGAATTCACAGTGACTGCTGCGTTCGTG  
 GR-45 ACTTGCTTACAAGCCTGTGAGTACTTGAAGCAGTATACCCGAATCTAGAGTGCAACATGGCAAGCATGTGCGAATTCACAGTGACTGCTGCGTTCGTG  
 GR-46 ACTTGCTTACAAGCCTGTGAGTACTTGAAGCAGTATACCCGAATCTAGAGTGCAACATGGCAAGCATGTGCGAATTCACAGTGACTGCTGCGTTCGTG  
 SP15 ACTTGCTTACAAGCCTGTGAGTACTTGAAGCAGTATACCCGAATCTAGAGTGCAACATGGCAAGCATGTGCGAATTCACAGTGACTGCTGCGTTCGTG  
 6-364 ACTTGCTTACAAGCCTGTGAGTACTTGAAGCAGTATACCCGAATCTAGAGTGCAACATGGCAAGCATGTGCGAATTCACAGTGACTGCTGCGTTCGTG  
 6-798 ACTTGCTTACAAGCCTGTGAGTACTTGAAGCAGTATACCCGAATCTAGAGTGCAACATGGCAAGCATGTGCGAATTCACAGTGACTGCTGCGTTCGTG

4001 4025 4050 4075 4100  
 GR AAAATCCATACTTCGATTGGGAGGAACAGGCGCTTGTAGGTAAGTGTCTTCTCTGCCTAATGTTCTGGTTGCTGCTTATGACCAATTGA  
 GR-1 AAAATCCATACTTCGATTGGGAGGAACAGGCGCTTGTAGGTAAGTGTCTTCTCTGCCTAATGTTCTGGTTGCTGCTTATGACCAATTGA  
 GR-44 AAAATCCATACTTCGATTGGGAGGAACAGGCGCTTGTAGGTAAGTGTCTTCTCTGCCTAATGTTCTGGTTGCTGCTTATGACCAATTGA  
 GR-45 AAAATCCATACTTCGATTGGGAGGAACAGGCGCTTGTAGGTAAGTGTCTTCTCTGCCTAATGTTCTGGTTGCTGCTTATGACCAATTGA  
 GR-46 AAAATCCATACTTCGATTGGGAGGAACAGGCGCTTGTAGGTAAGTGTCTTCTCTGCCTAATGTTCTGGTTGCTGCTTATGACCAATTGA  
 SP15 AAAATCCATACTTCGATTGGGAGGAACAGGCGCTTGTAGGTAAGTGTCTTCTCTGCCTAATGTTCTGGTTGCTGCTTATGACCAATTGA  
 6-364 AAAATCCATACTTCGATTGGGAGGAACAGGCGCTTGTAGGTAAGTGTCTTCTCTGCCTAATGTTCTGGTTGCTGCTTATGACCAATTGA  
 6-798 AAAATCCATACTTCGATTGGGAGGAACAGGCGCTTGTAGGTAAGTGTCTTCTCTGCCTAATGTTCTGGTTGCTGCTTATGACCAATTGA

4101 4125 4150 4175 4200  
 GR ATATAGAGTGGTGCAAAAGGTGTTTCACATTCAGAAGACTCCTCCTCCAATAGACGAGAGCAGGTTGGACGAGGACGTTGATGACGAGGCGAGGCGCGG  
 GR-1 ATATAGAGTGGTGCAAAAGGTGTTTCACATTCAGAAGACTCCTCCTCCAATAGACGAGAGCAGGTTGGACGAGGACGTTGATGACGAGGCGAGGCGCGG  
 GR-44 ATATAGAGTGGTGCAAAAGGTGTTTCACATTCAGAAGACTCCTCCTCCAATAGACGAGAGCAGGTTGGACGAGGACGTTGATGACGAGGCGAGGCGCGG  
 GR-45 ATATAGAGTGGTGCAAAAGGTGTTTCACATTCAGAAGACTCCTCCTCCAATAGACGAGAGCAGGTTGGACGAGGACGTTGATGACGAGGCGAGGCGCGG  
 GR-46 ATATAGAGTGGTGCAAAAGGTGTTTCACATTCAGAAGACTCCTCCTCCAATAGACGAGAGCAGGTTGGACGAGGACGTTGATGACGAGGCGAGGCGCGG  
 SP15 ATACAGAGTGGTGCAAAAGGTGTTTCACATTCAGAAGACTCCTCCTCCAATAGACGAGAGCAGGTTGGACGAGGACGTTGATGACGAGGCGAGGCGCGG  
 6-364 ATATAGAGTGGTGCAAAAGGTGTTTCACATTCAGAAGACTCCTCCTCCAATAGACGAGAGCAGGTTGGACGAGGACGTTGATGACGAGGCGAGGCGCGG  
 6-798 ATACAGAGTGGTGCAAAAGGTGTTTCACATTCAGAAGACTCCTCCTCCAATAGACGAGAGCAGGTTGGACGAGGACGTTGATGACGAGGCGAGGCGCGG

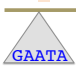

K/T

4201 4225 4250 4275 4300

GR CCGTGGTCCACCGACACGACGCCGCGAACACGCCCTTCTAGCTCACGACCTCTCCAAGTACTACGGGAAACATCTCGCCGTAGACCAAGTCTCGTTTA  
GR-1 CGCGTGGTCCACCGACACGACGCCGCGAACACGCCCTTCTAGCTCACGACCTCTCCAAGTACTACGGGAAACATCTCGCCGTAGACCAAGTCTCGTTTA  
GR-44 CGCGTGGTCCACCGACACGACGCCGCGAACACGCCCTTCTAGCTCACGACCTCTCCAAGTACTACGGGAAACATCTCGCCGTAGACCAAGTCTCGTTTA  
GR-45 CGCGTGGTCCACCGACACGACGCCGCGAACACGCCCTTCTAGCTCACGACCTCTCCAAGTACTACGGGAAACATCTCGCCGTAGACCAAGTCTCGTTTA  
GR-46 CGCGTGGTCCACCGACACGACGCCGCGAACACGCCCTTCTAGCTCACGACCTCTCCAAGTACTACGGGAAACATCTCGCCGTAGACCAAGTCTCGTTTA  
SP15 CGCGTGGTCCACCGACACGACGCCGCGAACACGCCCTTCTAGCTCACGACCTCTCCAAGTACTACGGGAAACATCTCGCCGTAGACCAAGTCTCGTTTA  
6-364 CGCGTGGTCCACCGACACGACGCCGCGAACACGCCCTTCTAGCTCACGACCTCTCCAAGTACTACGGGAAACATCTCGCCGTAGACCAAGTCTCGTTTA  
6-798 CGCGTGGTCCACCGACACGACGCCGCGAACACGCCCTTCTAGCTCACGACCTCTCCAAGTACTACGGGAAACATCTCGCCGTAGACCAAGTCTCGTTTA

Exon 25

4301 4325 4350 4375 4400

GR GTGTGAACGACGGCGAATGCTTCGGTCTATTGGGTGTGAATGGTGCCGGAAAAACAACCACCTTCAAGATGCTGATGGGTGATGAGTCCATTTCAAGCGG  
GR-1 GTGTGAACGACGGCGAATGCTTCGGTCTATTGGGTGTGAATGGTGCCGGAAAAACAACCACCTTCAAGATGCTGATGGGTGATGAGTCCATTTCAAGCGG  
GR-44 GTGTGAACGACGGCGAATGCTTCGGTCTATTGGGTGTGAATGGTGCCGGAAAAACAACCACCTTCAAGATGCTGATGGGTGATGAGTCCATTTCAAGCGG  
GR-45 GTGTGAACGACGGCGAATGCTTCGGTCTATTGGGTGTGAATGGTGCCGGAAAAACAACCACCTTCAAGATGCTGATGGGTGATGAGTCCATTTCAAGCGG  
GR-46 GTGTGAACGACGGCGAATGCTTCGGTCTATTGGGTGTGAATGGTGCCGGAAAAACAACCACCTTCAAGATGCTGATGGGTGATGAGTCCATTTCAAGCGG  
SP15 GTGTGAACGACGGCGAATGCTTCGGTCTATTGGGTGTGAATGGTGCCGGAAAAACAACCACCTTCAAGATGCTGATGGGTGATGAGTCCATTTCAAGCGG  
6-364 GTGTGAACGACGGCGAATGCTTCGGTCTATTGGGTGTGAATGGTGCCGGAAAAACAACCACCTTCAAGATGCTGATGGGTGATGAGTCCATTTCAAGCGG  
6-798 GTGTGAACGACGGCGAATGCTTCGGTCTATTGGGTGTGAATGGTGCCGGAAAAACAACCACCTTCAAGATGCTGATGGGTGATGAGTCCATTTCAAGCGG

Exon 26

4401 4425 4450 4475 4500

GR CGAGGCGTATGTCTCCGGGCACTCGGTGCAGAGGAATCTTGATAGAGTGCATGAGAATATTGGATATTGTCCGCAATTTGACGCATTATTTGGTGAGCTG  
GR-1 CGAGGCGTATGTCTCCGGGCACTCGGTGCAGAGGAATCTTGATAGAGTGCATGAGAATATTGGATATTGTCCGCAATTTGATGCAATTTATTTGGTGAGCTG  
GR-44 CGAGGCGTATGTCTCCGGGCACTCGGTGCAGAGGAATCTTGATAGAGTGCATGAGAATATTGGATATTGTCCGCAATTTGATGCAATTTATTTGGTGAGCTG  
GR-45 CGAGGCGTATGTCTCCGGGCACTCGGTGCAGAGGAATCTTGATAGAGTGCATGAGAATATTGGATATTGTCCGCAATTTGATGCAATTTATTTGGTGAGCTG  
GR-46 CGAGGCGTATGTCTCCGGGCACTCGGTGCAGAGGAATCTTGATAGAGTGCATGAGAATATTGGATATTGTCCGCAATTTGATGCAATTTATTTGGTGAGCTG  
SP15 CGAGGCGTATGTCTCCGGGCACTCGGTGCAGAGGAATCTTGATAGAGTGCATGAGAATATTGGATATTGTCCGCAATTTGACGCATTATTTGGTGAGCTG  
6-364 CGAGGCGTATGTCTCCGGGCACTCGGTGCAGAGGAATCTTGATAGAGTGCATGAGAATATTGGATATTGTCCGCAATTTGATGCAATTTATTTGGTGAGCTG  
6-798 CGAGGCGTATGTCTCCGGGCACTCGGTGCAGAGGAATCTTGATAGAGTGCATGAGAATATTGGATATTGTCCGCAATTTGACGCATTATTTGGTGAGCTG

Exon 27

4501 4525 4550 4575 4600

GR ACGGGTCGCCAGACACTCCACATGTTTGCCTTGATGCGCGGCTTGCCTTTGCGCACTGCGGCACCTCAGCTGAAACACTCGCACATGCGCTTGGCTTCT  
GR-1 ACGGGTCGCCAGACACTCCACATGTTTGCCTTGATGCGCGGCTTGCCTTTGCGCACTGCGGCACCTCAGCTGAAACACTCGCACATGCGCTTGGCTTCT  
GR-44 ACGGGTCGCCAGACACTCCACATGTTTGCCTTGATGCGCGGCTTGCCTTTGCGCACTGCGGCACCTCAGCTGAAACACTCGCACATGCGCTTGGCTTCT  
GR-45 ACGGGTCGCCAGACACTCCACATGTTTGCCTTGATGCGCGGCTTGCCTTTGCGCACTGCGGCACCTCAGCTGAAACACTCGCACATGCGCTTGGCTTCT  
GR-46 ACGGGTCGCCAGACACTCCACATGTTTGCCTTGATGCGCGGCTTGCCTTTGCGCACTGCGGCACCTCAGCTGAAACACTCGCACATGCGCTTGGCTTCT  
SP15 ACGGGTCGCCAGACACTCCACATGTTTGCCTTGATGCGCGGCTTGCCTTTGCGCACTGCGGCACCTCAGCTGAAACACTCGCACATGCGCTTGGCTTCT  
6-364 ACGGGTCGCCAGACACTCCACATGTTTGCCTTGATGCGCGGCTTGCCTTTGCGCACTGCGGCACCTCAGCTGAAACACTCGCACATGCGCTTGGCTTCT  
6-798 ACGGGTCGCCAGACACTCCACATGTTTGCCTTGATGCGCGGCTTGCCTTTGCGCACTGCGGCACCTCAGCTGAAACACTCGCACATGCGCTTGGCTTCT

Exon 28

4601 4625 4650 4675 4700

GR TCAAAACATCTCGATAAAAAGGGTGCATCAGTATTTCAGGCGGCACGAAACGCAAGCTTAAACACGGCGATAGCATTTCATGGGACGAAACACGGCTTGTGTTTGT  
GR-1 TCAAAACATCTCGATAAAAAGGGTGCATCAGTATTTCAGGCGGCACGAAACGCAAGCTTAAACACGGCGATAGCATTTCATGGGACGAAACACGGCTTGTGTTTGT  
GR-44 TCAAAACATCTCGATAAAAAGGGTGCATCAGTATTTCAGGCGGCACGAAACGCAAGCTTAAACACGGCGATAGCATTTCATGGGACGAAACACGGCTTGTGTTTGT  
GR-45 TCAAAACATCTCGATAAAAAGGGTGCATCAGTATTTCAGGCGGCACGAAACGCAAGCTTAAACACGGCGATAGCATTTCATGGGACGAAACACGGCTTGTGTTTGT  
GR-46 TCAAAACATCTCGATAAAAAGGGTGCATCAGTATTTCAGGCGGCACGAAACGCAAGCTTAAACACGGCGATAGCATTTCATGGGACGAAACACGGCTTGTGTTTGT  
SP15 TCAAAACATCTCGATAAAAAGGGTGCATCAGTATTTCAGGCGGCACGAAACGCAAGCTTAAACACGGCGATAGCATTTCATGGGACGAAACACGGCTTGTGTTTGT  
6-364 TCAAAACATCTCGATAAAAAGGGTGCATCAGTATTTCAGGCGGCACGAAACGCAAGCTTAAACACGGCGATAGCATTTCATGGGACGAAACACGGCTTGTGTTTGT  
6-798 TCAAAACATCTAGATAAAAAGGGTGCATCAGTATTTCAGGCGGCACGAAACGCAAGCTTAAACACGGCGATAGCATTTCATGGGACGAAACACGGCTTGTGTTTGT

Exon 29

4701 4725 4750 4775 4800

GR TGATGAGCCTACAACGGAGTTCGATCCCGCCGCTAAACGCCACGATATGGCGCGCTACCCGCGCGCTGCAGCGAGCAGGTCGCGGCTGGTACTGACGTCA  
GR-1 TGATGAGCCTACAACGGAGTTCGATCCCGCCGCTAAACGCCACGATATGGCGCGCTACCCGCGCGCTGCAGCGAGCAGGTCGCGGCTGGTACTGACGTCA  
GR-44 TGATGAGCCTACAACGGAGTTCGATCCCGCCGCTAAACGCCACGATATGGCGCGCTACCCGCGCGCTGCAGCGAGCAGGTCGCGGCTGGTACTGACGTCA  
GR-45 TGATGAGCCTACAACGGAGTTCGATCCCGCCGCTAAACGCCACGATATGGCGCGCTACCCGCGCGCTGCAGCGAGCAGGTCGCGGCTGGTACTGACGTCA  
GR-46 TGATGAGCCTACAACGGAGTTCGATCCCGCCGCTAAACGCCACGATATGGCGCGCTACCCGCGCGCTGCAGCGAGCAGGTCGCGGCTGGTACTGACGTCA  
SP15 TGATGAGCCTACAACGGAGTTCGATCCCGCCGCTAAACGCCACGATATGGCGCGCTACCCGCGCGCTGCAGCGAGCAGGTCGCGGCTGGTACTGACGTCA  
6-364 TGATGAGCCTACAACGGAGTTCGATCCCGCCGCTAAACGCCACGATATGGCGCGCTACCCGCGCGCTGCAGCGAGCAGGTCGCGGCTGGTACTGACGTCA  
6-798 TGATGAGCCTACAACGGAGTTCGATCCCGCCGCTAAACGCCACGATATGGCGCGCTACCCGCGCGCTGCAGCGAGCAGGTCGCGGCTGGTACTGACGTCA



4801 4825 4850 4875 4900  
GR CACAGTATGGAGGAGTGCAGGCGTTGTGTTTCGCGACTGACCATCATGGTCAATGGTCGCTTCCAGTGTCTGGGCACGCCACAACATCTCAAGAACAAT  
GR-1 CACAGTATGGAGGAGTGCAGGCGTTGTGTTTCGCGACTGACCATCATGGTCAATGGTCGCTTCCAGTGTCTGGGCACGCCACAACATCTCAAGAACAAT  
GR-44 CACAGTATGGAGGAGTGCAGGCGTTGTGTTTCGCGACTGACCATCATGGTCAATGGTCGCTTCCAGTGTCTGGGCACGCCACAACATCTCAAGAACAAT  
GR-45 CACAGTATGGAGGAGTGCAGGCGTTGTGTTTCGCGACTGACCATCATGGTCAATGGTCGCTTCCAGTGTCTGGGCACGCCACAACATCTCAAGAACAAT  
GR-46 CACAGTATGGAGGAGTGCAGGCGTTGTGTTTCGCGACTGACCATCATGGTCAATGGTCGCTTCCAGTGTCTGGGCACGCCACAACATCTCAAGAACAAT  
SP15 CATTAGCATGGAGGAGTGCAGGCGTTGTGTTTCGCGACTGACCATCATGGTCAATGGTCGCTTCCAGTGTCTGGGCACGCCACAACATCTCAAGAACAAT  
6-364 CATTAGCATGGAGGAGTGCAGGCGTTGTGTTTCGCGACTGACCATCATGGTCAATGGTCGCTTCCAGTGTCTGGGCACGCCACAACATCTCAAGAACAAT  
6-798 CACAGTATGGAGGAGTGCAGGCGTTGTGTTTCGCGACTGACCATCATGGTCAATGGTCGCTTCCAGTGTCTGGGCACGCCACAACATCTCAAGAACAAT

4901 4925 4950 4975 5000  
GR TCTCTCAAGGCTTTACTCTAATCATAAAAAATGAAAAGTACGACAGTGAAGGTGACACGCAGTCAAGTAAACAGCACACCAGCAGTGTAGATAGTGTCAA  
GR-1 TCTCTCAAGGCTTTACTTTAATCATAAAAAATGAAAAGTACGACAGTGAAGGTGACACGCAGTCAAGTAAACAGCACACCAGCAGTGTAGATAGTGTCAA  
GR-44 TTTCTCAAGGCTTTACTTTAATCATAAAAAATGAAAAGTACGACAGTGAAGGTGACACGCAGTCAAGTAAACAGCACACCAGCAGTGTAGATAGTGTCAA  
GR-45 TCTCTCAAGGCTTTACTTTAATCATAAAAAATGAAAAGTACGACAGTGAAGGTGACACGCAGTCAAGTAAACAGCACACCAGCAGTGTAGATAGTGTCAA  
GR-46 TCTCTCAAGGCTTTACTTTAATCATAAAAAATGAAAAGTACGACAGTGAAGGTGACACGCAGTCAAGTAAACAGCACACCAGCAGTGTAGATAGTGTCAA  
SP15 TTTCTCAAGGCTTTACTTTAATCATAAAAAATGAAAAGTACGACAGTGAAGGTGACACGCAGTCAAGTAAACAGCACACCAGCAGTGTAGATAGTGTCAA  
6-364 TTTCTCAAGGCTTTACTTTAATCATAAAAAATGAAAAGTACGACAGTGAAGGTGACACGCAGTCAAGTAAACAGCACACCAGCAGTGTAGATAGTGTCAA  
6-798 TTTCTCAAGGCTTTACTTTAATCATAAAAAATGAAAAGTACGACAGTGAAGGTGACACGCAGTCAAGTAAACAGCACACCAGCAGTGTAGATAGTGTCAA

5001 5025 5050 5075 5100  
GR ACTATACGTCTCTGAGAAGCTTTGAAAGTCCAAAGATAATGGAAGAATATCACGGTCTTCTGACTTACTACTTGCCTGACCGTAGCATGGCATGGTCACGA  
GR-1 ACTATACGTCTCTGAGAAGCTTTGAAAGTCCAAAGATAATGGAAGAATATCACGGTCTTCTGACTTACTACTTGCCTGACCGTAGCATGGCATGGTCACGA  
GR-44 ACTATACGTCTCTGAGAAGCTTTGAAAGTCCAAAGATAATGGAAGAATATCACGGTCTTCTGACTTACTACTTGCCTGACCGTAGCATGGCATGGTCACGA  
GR-45 ACTATACGTCTCTGAGAAGCTTTGAAAGTCCAAAGATAATGGAAGAATATCACGGTCTTCTGACTTACTACTTGCCTGACCGTAGCATGGCATGGTCACGA  
GR-46 ACTATACGTCTCTGAGAAGCTTTGAAAGTCCAAAGATAATGGAAGAATATCACGGTCTTCTGACTTACTACTTGCCTGACCGTAGCATGGCATGGTCACGA  
SP15 ACTATACGTCTCTGAGAAGCTTTGAAAGTCCAAAGATAATGGAAGAATATCACGGTCTTCTGACTTACTACTTGCCTGACCGTAGCATGGCATGGTCACGA  
6-364 ACTATACGTCTCTGAGAAGCTTTGAAAGTCCAAAGATAATGGAAGAATATCACGGTCTTCTGACTTACTACTTGCCTGACCGTAGCATGGCATGGTCACGA  
6-798 ACTATACGTCTCTGAGAAGCTTTGAAAGTCCAAAGATAATGGAAGAATATCACGGTCTTCTGACTTACTACTTGCCTGACCGTAGCATGGCATGGTCACGA

5101 5125 5150 5175 5200  
GR ATGTTTGGTATAATGGAGCGCGCCAAACAGATCTTACAATTTGAGGACTACAGCATATCGCAGACTACCTCGAACAAATATCTTGCAGTTTACCAAAT  
GR-1 ATGTTTGGTATAATGGAGCGCGCCAAACAGATCTTACAATTTGAGGACTACAGCATATCGCAGACTACCTCGAACAAATATCTTGCAGTTTACCAAAT  
GR-44 ATGTTTGGTATAATGGAGCGCGCCAAACAGATCTTACAATTTGAGGACTACAGCATATCGCAGACTACCTCGAACAAATATCTTGCAGTTTACCAAAT  
GR-45 ATGTTTGGTATAATGGAGCGCGCCAAACAGATCTTACAATTTGAGGACTACAGCATATCGCAGACTACCTCGAACAAATATCTTGCAGTTTACCAAAT  
GR-46 ATGTTTGGTATAATGGAGCGCGCCAAACAGATCTTACAATTTGAGGACTACAGCATATCGCAGACTACCTCGAACAAATATCTTGCAGTTTACCAAAT  
SP15 ATGTTTGGTATCATGGAGCGCGCCAAACAGATCTTACAATTTGAGGACTACAGCATATCGCAGACTACCTCGAACAAATATCTTGCAGTTTACCAAAT  
6-364 ATGTTTGGTATAATGGAGCGCGCCAAACAGATCTTACAATTTGAGGACTACAGCATATCGCAGACTACCTCGAACAAATATCTTGCAGTTTACCAAAT  
6-798 ATGTTTGGTATCATGGAGCGCGCCAAACAGATCTTACAATTTGAGGACTACAGCATATCGCAGACTACCTCGAACAAATATCTTGCAGTTTACCAAAT

5201 5225  
GR ACCAAAGAGAAGAAGGAACGACGTTA  
GR-1 ACCAAAGAGAAGAAGGAACGACGTTA  
GR-44 ACCAAAGAGAAGAAGGAACGACGTTA  
GR-45 ACCAAAGAGAAGAAGGAACGACGTTA  
GR-46 ACCAAAGAGAAGAAGGAACGACGTTA  
SP15 ACCAAAGAGAAGAAGGAACGACGTTA  
6-364 ACCAAAGAGAAGAAGGAACGACGTTA  
6-798 ACCAAAGAGAAGAAGGAACGACGTTA
